# Supplementary material
Source: Springer Nature journal article supplement (https://www.springermedizin.de/resource/supplementary/13223_2013_504_MOESM1_ESM.pdf/9596666)
Supplement: MOESM1 [file 9596666]

## Appendix 1:

- MEDLINE: [(exp vitamin d/ or exp cholecalciferol/ or exp hydroxycholecalciferols/ or exp calcifediol/ or exp dihydroxycholecalciferols/ or exp calcitriol/ or exp 24,25-dihydroxyvitamin d 3/ or exp ergocalciferols/ or exp dihydrotachysterol/ or exp 25-hydroxyvitamin d 2)/OR (vitamin D or vitamin D2 or Vitamin D3 or ergocalciferol\* or alfacacidol\* or alfa-cacidol\* or calcitriol\* or cholecalciferol\* or calciol\* or calciferol\* or hydroxycholecalciferol\* or hydroxy-cholecalciferol\* or dihydroxycholecalciferol\* or dihydroxy-cholecalciferol\* or 24,25-dihydroxyvitamin d3 or 24,25-dihydroxy-vitamin d3 or dihydrotachysterol\* or dihydro-tachysterol\* or 25-hydroxyvitamin d2 or 25-hydroxy-vitamin d2 or vitamin D deficien\*)OR(exp vitamin d deficiency/ or exp osteomalacia/ or exp rickets/)] AND[(exp asthma/ or exp bronchial hyperreactivity/ or exp respiratory hypersensitivity/ or exp alveolitis, extrinsic allergic/ or exp aspergillosis, allergic bronchopulmonary)/OR((bronch\* or respirat\*) adj3 (hyperreactiv\* or hyper-reactiv\* or hypersensitiv\* or hyper-sensitiv\*))OR((asthma\* or wheezing\*).mp.OR((reactiv\* adj3 airway\*).mp.OR(exp anti-asthmatic agents/ or exp bronchodilator agents)/OR(anti asthmatic\* or anti-asthmatic\* or bronchodilator\* or broncho-dilator\*).mp.)] AND[(exp pediatrics/ or exp neonatology/ or exp perinatology)/OR(exp adolescent/ or exp child/ or exp child, preschool/ or exp infant/ or exp infant, newborn/ or exp infant, low birth weight/ or exp infant, small for gestational age/ or exp infant, very low birth weight/ or exp infant, postmature/ or exp infant, premature/ or exp infant, extremely premature)/OR(exp Infant, Newborn, Diseases)/OR(infant\* or child\* or adolescen\* or pediatric\* or paediatric\* or newborn\* or new-born\* or baby or babies or neonat\* neonat\* or toddler\* or preschool\* or pre-school\* or teenage\* or teen-age\*).mp.]

- EMBASE: [(exp vitamin d/ or exp cholecalciferol/ or exp hydroxycholecalciferols/ or exp calcifediol/ or exp dihydroxycholecalciferols/ or exp calcitriol/ or exp 24,25-dihydroxyvitamin d 3/ or exp ergocalciferols/ or exp dihydrotachysterol/ or exp 25-hydroxyvitamin d 2/ or exp vitamin d deficiency/ or exp osteomalacia/ or exp rickets)/OR (vitamin D or vitamin D2 or Vitamin D3 or ergocalciferol\* or alfacacidol\* or alfacacidol\* or calcitriol\* or cholecalciferol\* or calciol\* or calciferol\* or hydroxycholecalciferol\* or hydroxy-cholecalciferol\* or dihydroxycholecalciferol\* or dihydroxy-cholecalciferol\* or 24,25-dihydroxyvitamin d3 or 24,25-dihydroxy-vitamin d3 or dihydrotachysterol\* or dihydro-tachysterol\* or 25-hydroxyvitamin d2 or 25-hydroxyvitamin d2 or vitamin D deficien\*)]AND[(exp asthma/ or exp bronchial hyperreactivity/ or exp respiratory hypersensitivity/ or exp alveolitis, extrinsic allergic/ or exp allergic bronchopulmonary/ or exp anti-asthmatic agents/ or exp bronchodilator agents)/OR((bronch\* or respirat\*) adj3 (hyperreactiv\* or hyper-reactiv\* or hypersensitiv\* or hyper-sensitiv\*))OR(asthma\* or wheezing\*)OR(reactiv\* adj3 airway\*)OR(anti asthmatic\* or anti-asthmatic\* or bronchodilator\* or bronchodilator\*)]AND[(exp pediatrics/ or exp neonatology/ or exp perinatology/ or exp adolescent/ or exp child/ or exp child, preschool/ or exp infant/ or exp infant, newborn/ or exp infant, low birth weight/ or exp infant, small for gestational age/ or exp infant, very low birth weight/ or exp infant, postmature/ or exp infant, premature/ or exp infant, extremely premature/ or exp Infant, Newborn, Diseases)/OR(infant\* or child\* or adolescen\* or pediatric\* or paediatric\* or newborn\* or new-born\* or baby or babies or neonat\* neo-nat\* or toddler\* or preschool\* or pre-school\* or teenage\* or teen-age\*)]
